# Supplementary material
Source: PubMed Central journal article supplement (PMC6600922)
Supplement: pnas.1900762116.sapp.pdf [file pnas.1900762116.sapp.pdf]

## Supplementary information

### Supplementary figures

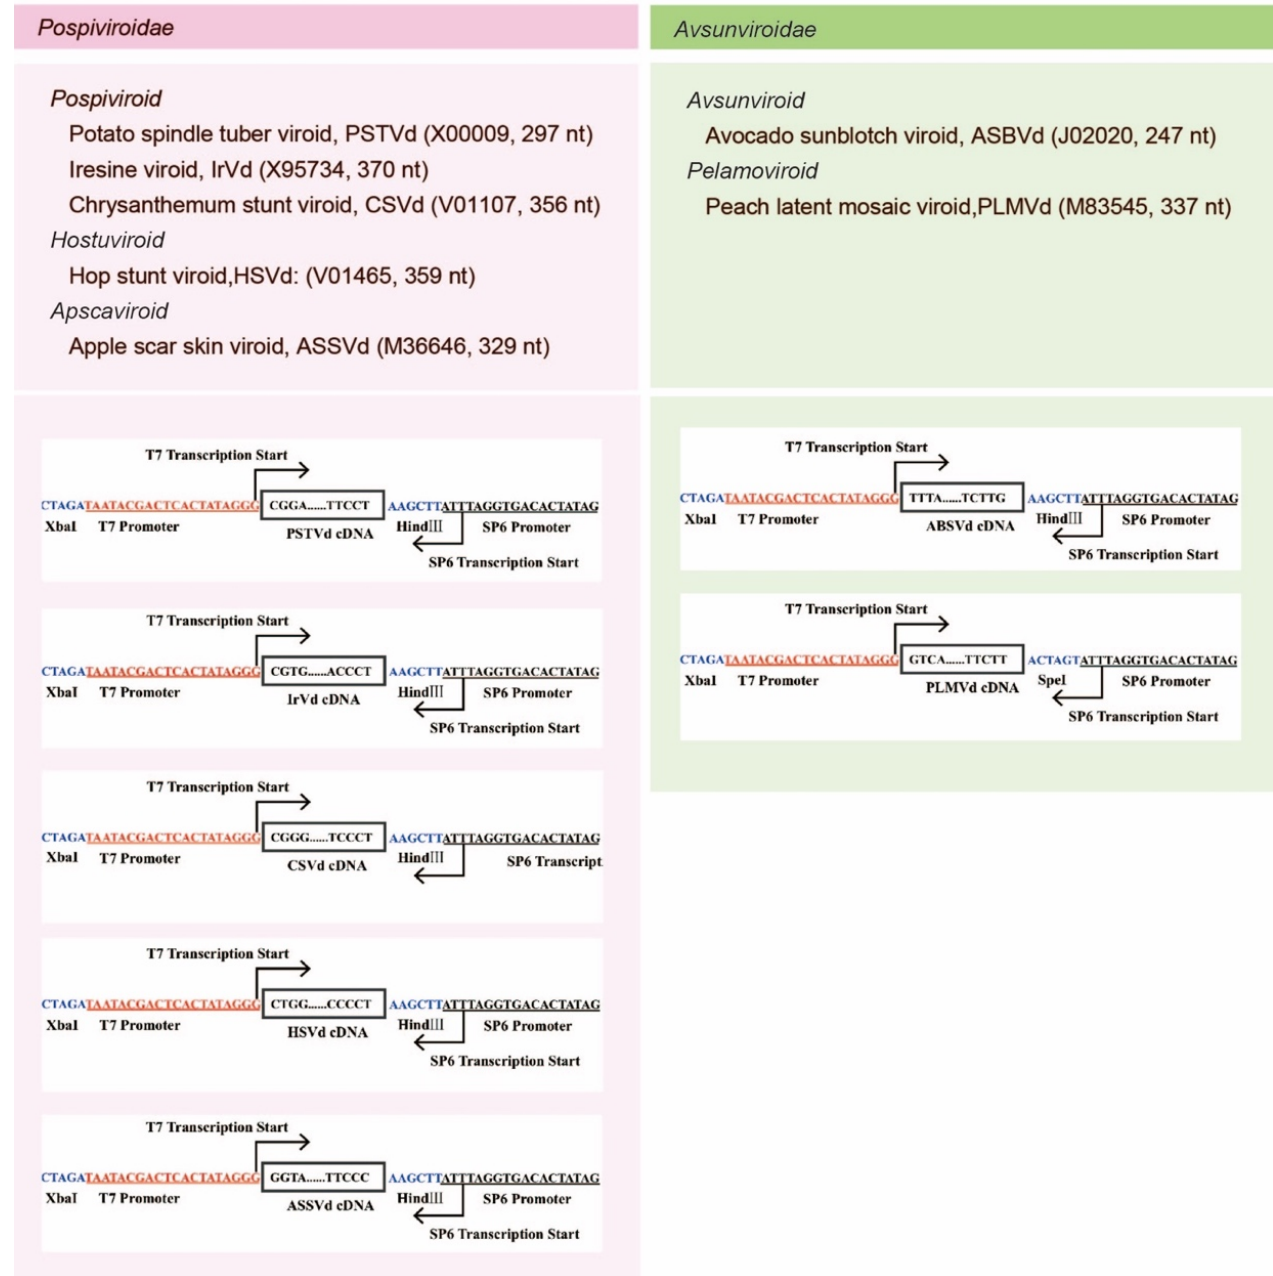

**Supp. Figure S1.** Sequence constructs for generating plus (+) strand *in-vitro* transcripts of viroid cDNA clones.

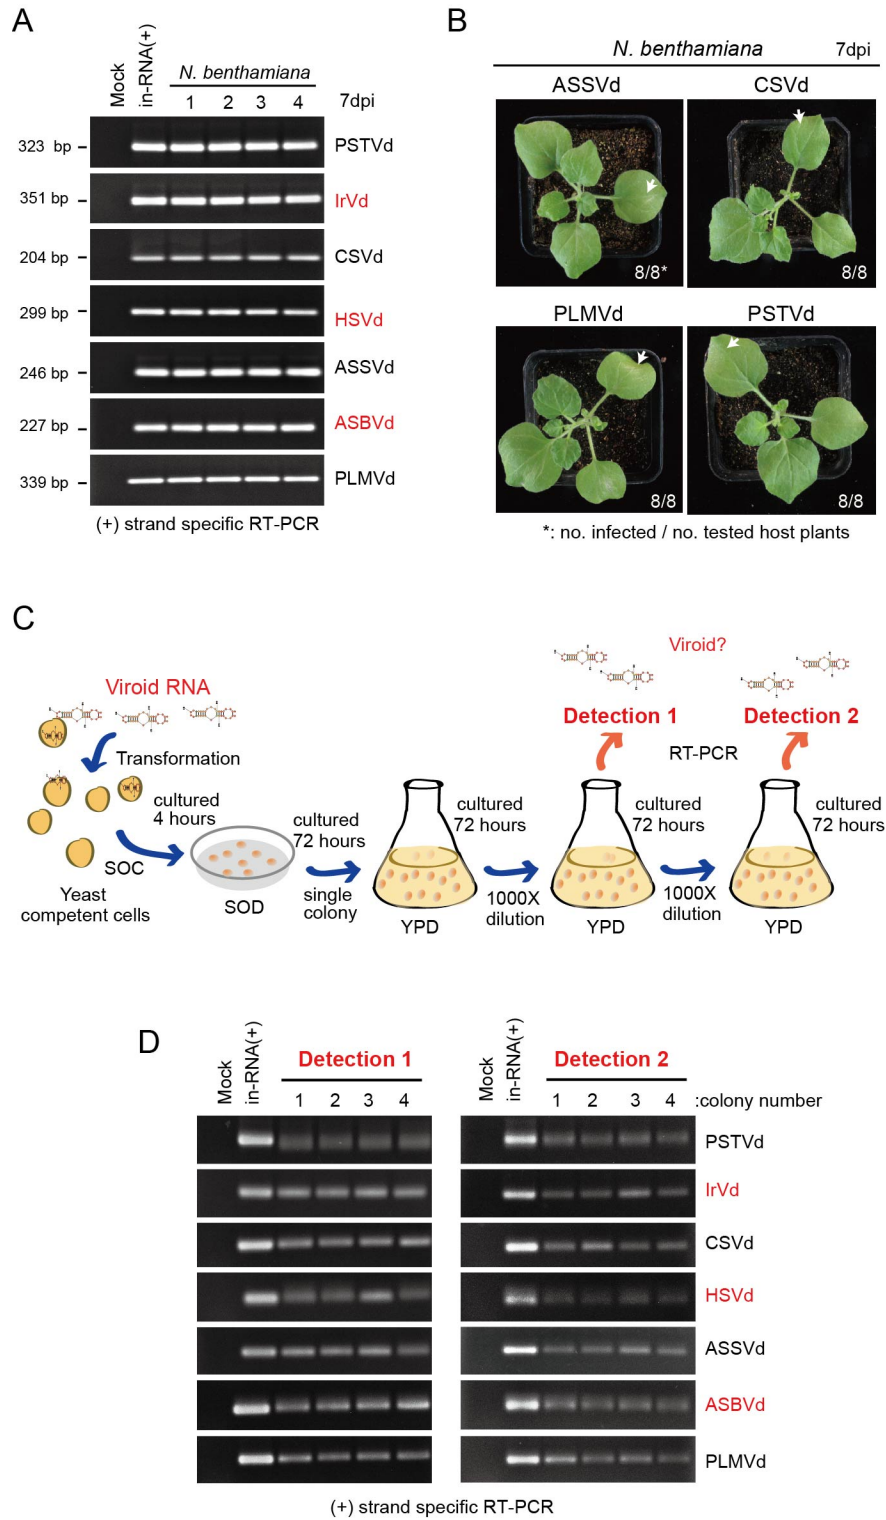

**Supp. Figure S2.** Viroid infection in plants and yeast. (A) RT-PCR detection of viroid RNA accumulation in systemic uninoculated leaves of *N. benthamiana* plants mechanically inoculated

with *in-vitro* transcripts of viroid cDNA clones. (B) *N. benthamiana* plants infected with viroids. (C) Experimental procedure for inoculating *in-vitro* transcripts of viroid cDNA clones to yeast. (D) RT-PCR detection of viroid RNA accumulation in yeast. Each lane represents RNA sample derived from single independent yeast colony. In-RNA, *in vitro* RNA transcripts of viroid cDNA clones.

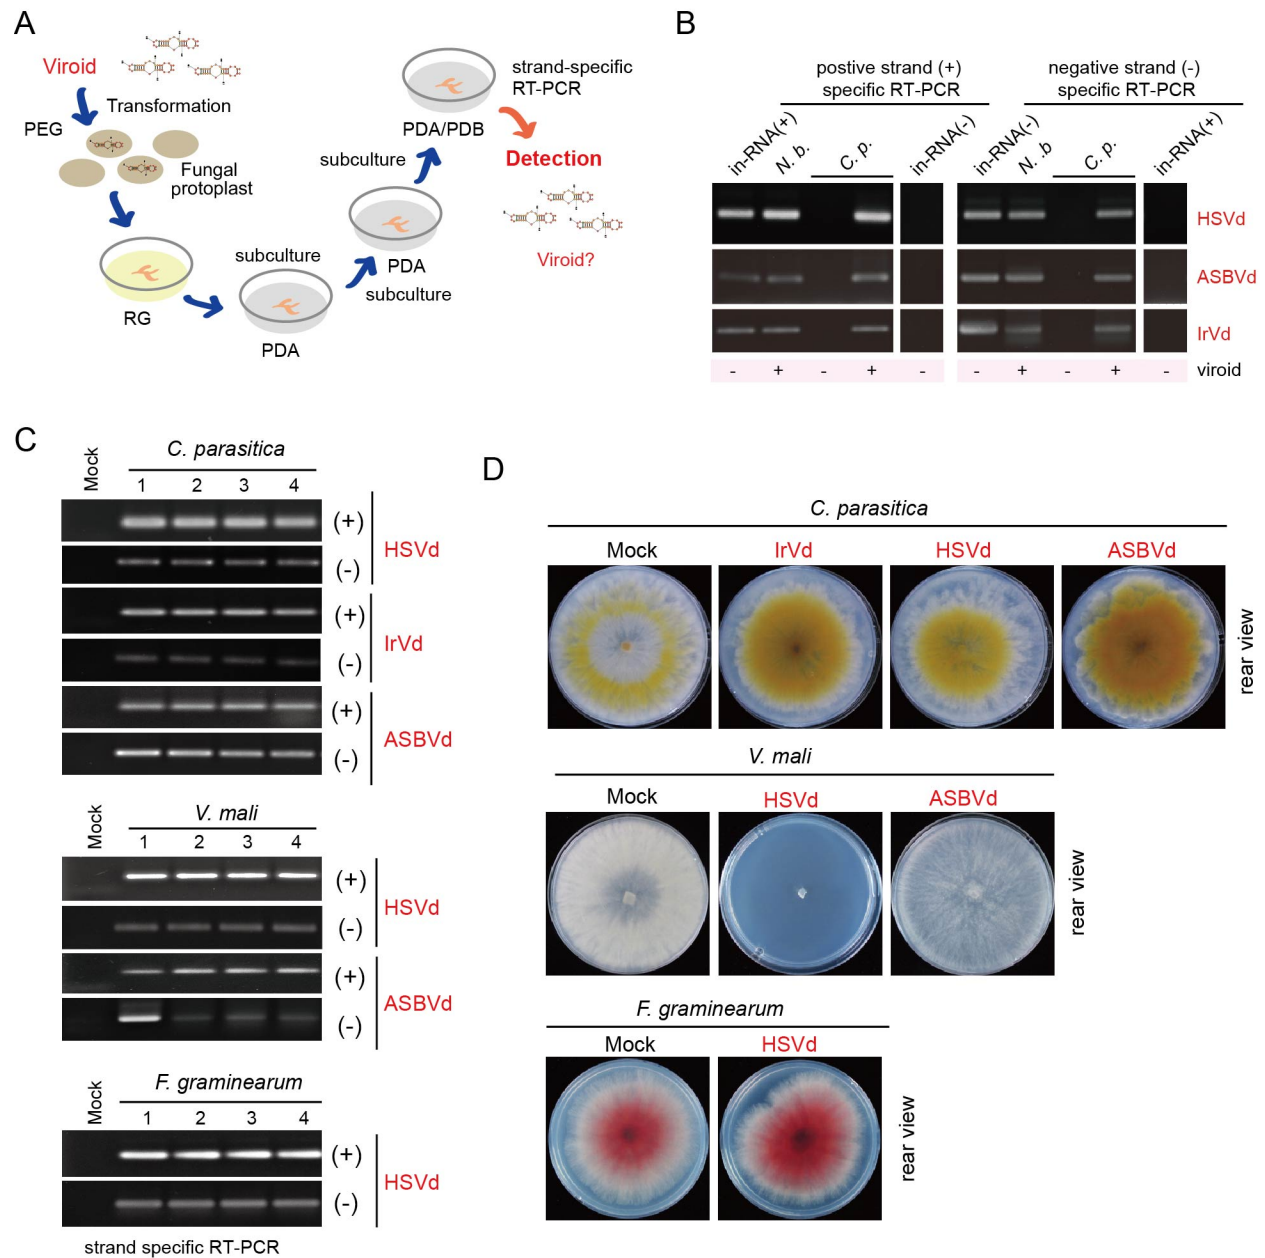

**Supp. Figure S3.** Viroid infection in filamentous fungi. (A) Experimental procedure for inoculating *in-vitro* transcripts of viroid cDNA clones to filamentous fungi. (B) Confirmation of strand specificity of RT-PCR detection. In-RNA: plus (+) or minus (-) strand *in vitro* transcripts of viroid cDNAs were included to confirm strand-specific amplification. (C) RT-PCR detection of viroid RNA accumulation in fungal isolates regenerated from fungal spheroplasts that have been transfected with *in-vitro* transcripts of viroid cDNA clones. (D) Phenotypic growth of fungi

infected with viroids. Fungi were grown on PDA medium (10 cm plate) for 3 (*V. mali* and *F. graminearum*) or 5 (*C. parasitica*) days and photographed.

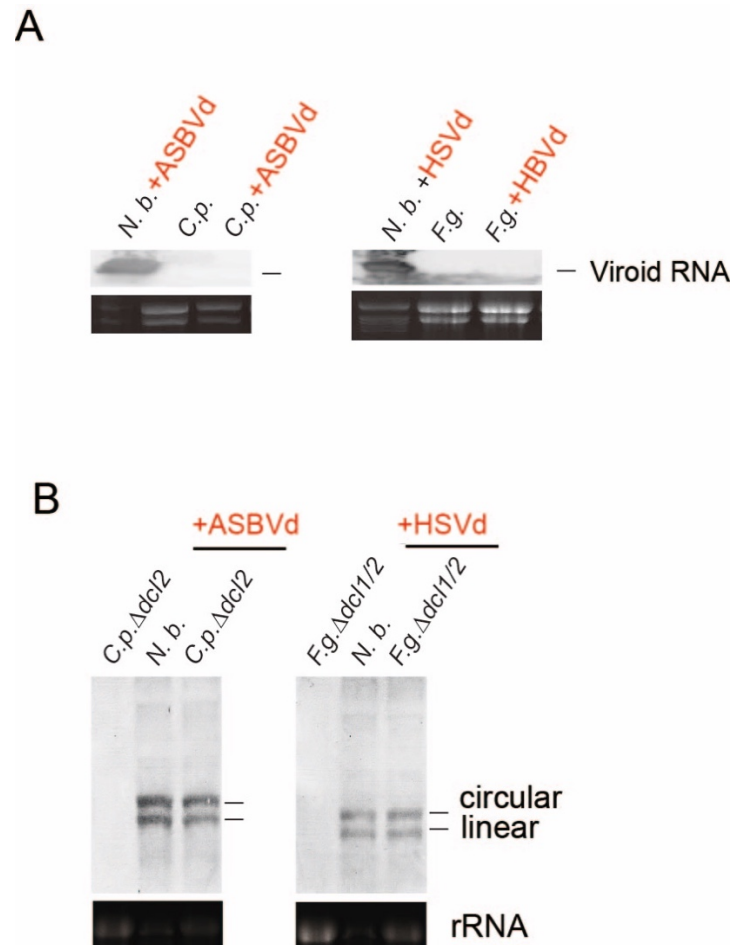

**Supp. Figure S4.** Detection of viroid RNAs in plants and fungi by via RNA blotting. (A) Total RNAs were separated on denaturing agarose gel (2%). (B) Total RNAs were separated on denaturing PAGE (7.5%). Viroid RNAs were detected via Dig-labelled DNA probes.

A

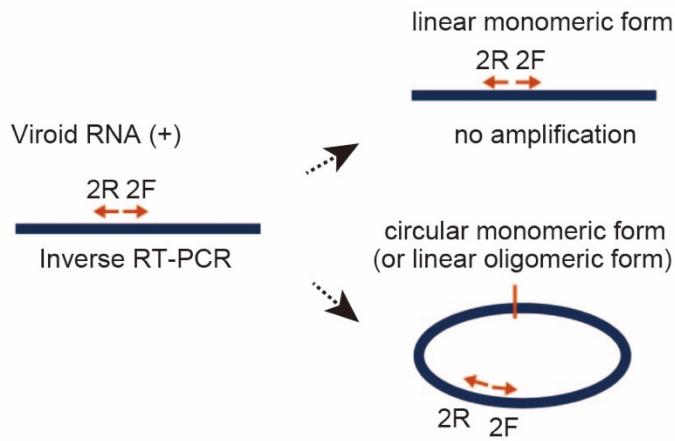

B

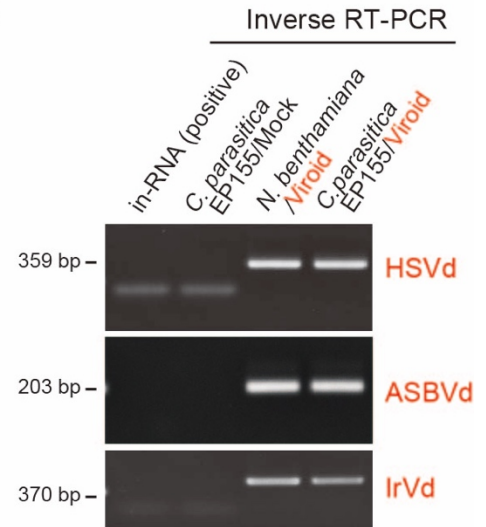

**Supp. Figure S5.** Detection of the circular (and/or linear oligomeric) form of (+)-genomic viroid RNAs via inverse RT-PCR. (A) Diagram of inverse RT-PCR, which can detect circular (and/or linear oligomeric) viroid RNAs. (B) inverse RT-PCR detection of circular (and/or linear oligomer) form of viroid RNAs in plant and fungal samples.

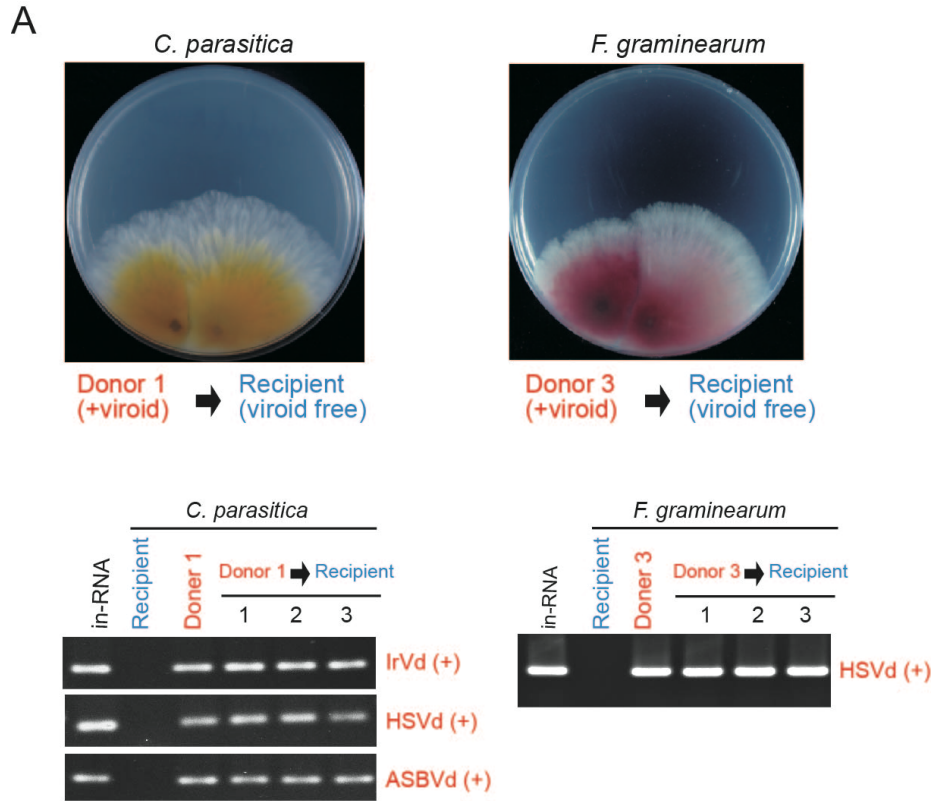

**B**

Efficiency of viroid transmission through conidia

| viroid | host strain          | no. infected/ no. tested spore germlins | total | % (mean ±SD) |
|--------|----------------------|-----------------------------------------|-------|--------------|
| ASBVd  | <i>C. p.</i>         | 8/8, 7/8, 6/8,                          | 21/24 | 87.5% ±0.10  |
|        | <i>C. p. Δdcl2</i>   | 8/8, 8/8, 7/8                           | 23/24 | 95.8% ±0.06  |
| HSVd   | <i>C. p.</i>         | 7/8, 5/8, 5/8                           | 17/24 | 70.8% ±0.12  |
|        | <i>C. p. Δdcl2</i>   | 5/8, 6/8, 6/8                           | 17/24 | 70.8% ±0.06  |
| IrVd   | <i>C. p.</i>         | 6/8, 5/8, 6/8                           | 17/24 | 70.8% ±0.06  |
| ASBVd  | <i>V. m.</i>         | 8/8, 7/8, 6/8                           | 21/24 | 87.5% ±0.10  |
| HSVd   | <i>F. g.</i>         | 5/10, 6/10, 5/10                        | 16/30 | 53.3% ±0.03  |
|        | <i>F. g. Δdcl1</i>   | 8/10, 7/10, 7/10                        | 22/30 | 73.3% ±0.04  |
|        | <i>F. g. Δdcl2</i>   | 8/10, 8/10, 5/10                        | 21/30 | 70.0% ±0.04  |
|        | <i>F. g. Δdcl1/2</i> | 13/15, 11/15, 13/15                     | 37/45 | 82.2% ±0.04  |

**Supp. Figure S6.** Horizontal and vertical transmission of viroids in filamentous fungi. (A) RT-PCR detection confirmed horizontal transmission of viroids through hyphal anastomosis. (B) Efficiency of viroid transmission through conidia.



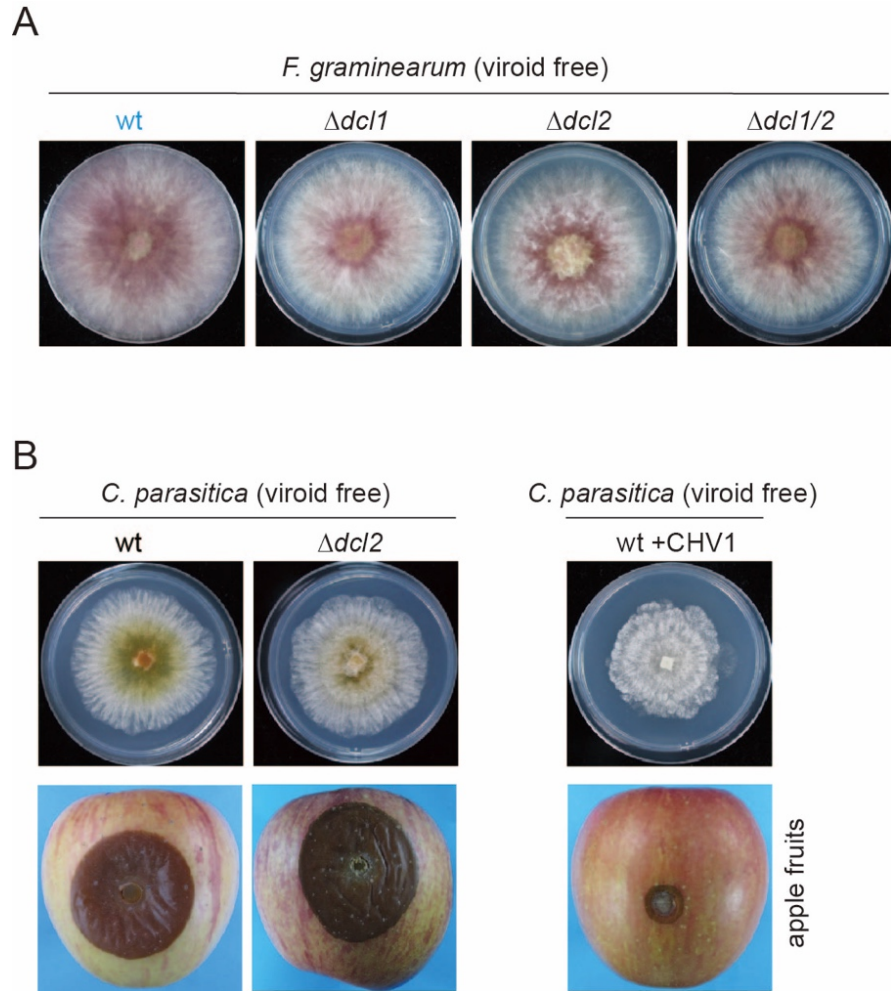

**Supp. Figure S7.** Phenotypic growth and virulence of viroid-free wild-type and *dcl2* mutants of fungi. (A) Phenotypic growth of viroid-free wild-type and *dcl2* mutants of *F. graminearum*. (B) Phenotypic growth and virulence on apple fruits of viroid-free wild-type and *dcl2* mutants of *C. parasitica*.



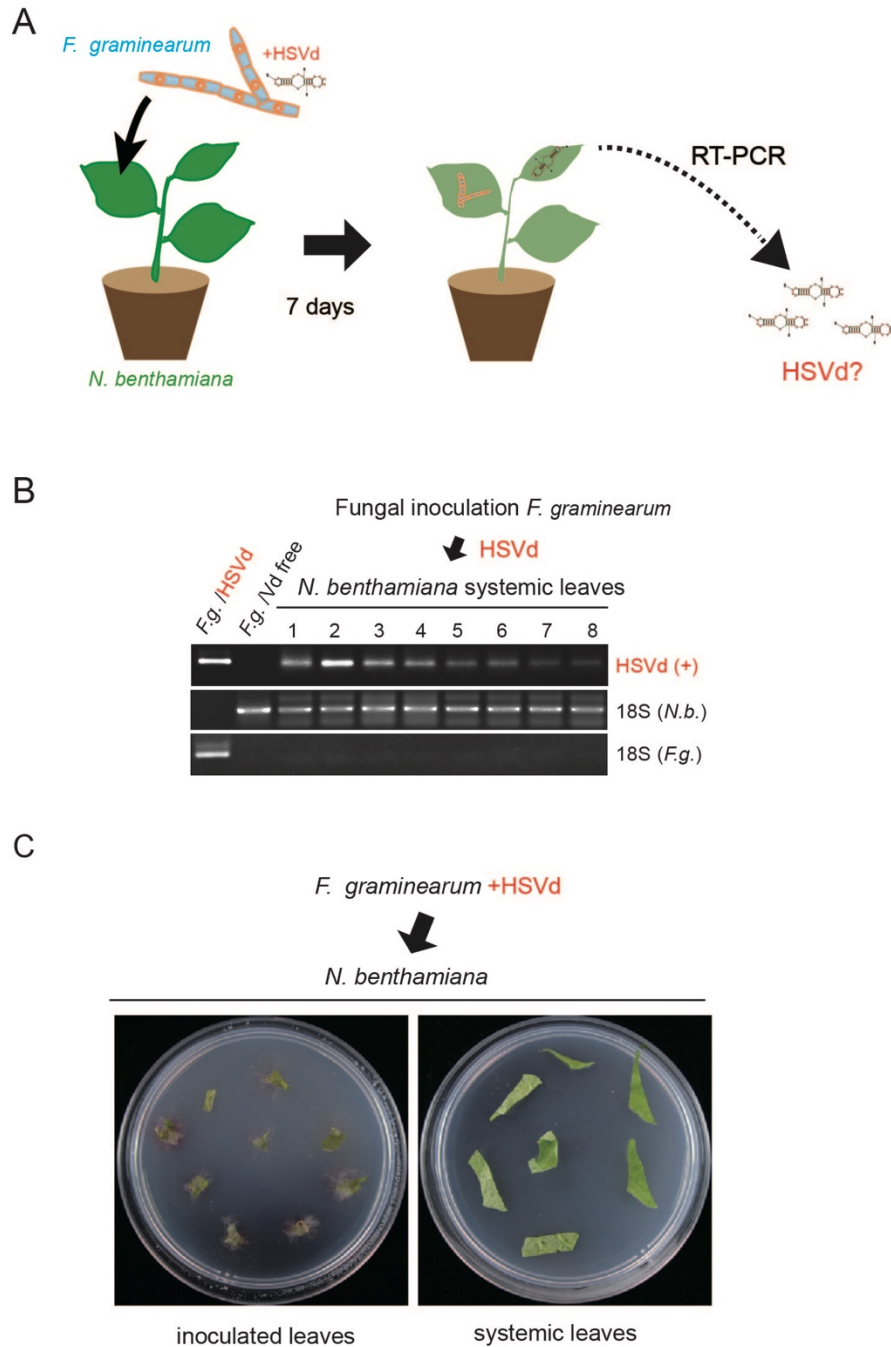

**Supp. Figure S8.** Transmission of HSVd from *F. graminearum* to the plant. (A) Experimental procedure for viroid transmission from *F. graminearum* to the plants. (B) RT-PCR detection of HSVd in uninoculated, systemic leaves of *N. benthamiana* plants inoculated with *F. graminearum* carrying HSVd. (C) The portions of systemic upper leaves were placed on medium to confirm the absence of *F. graminearum*.

Fig. S9

A

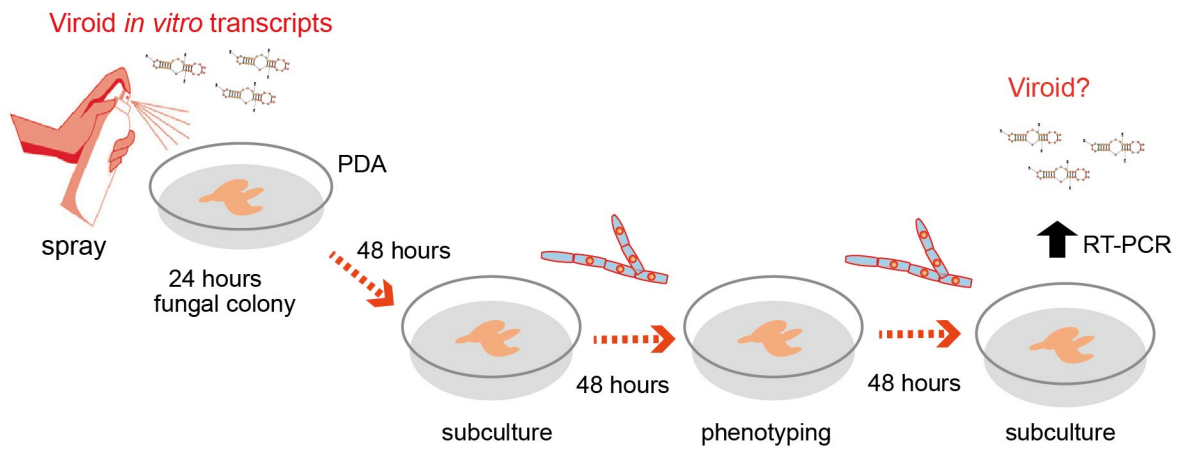

B

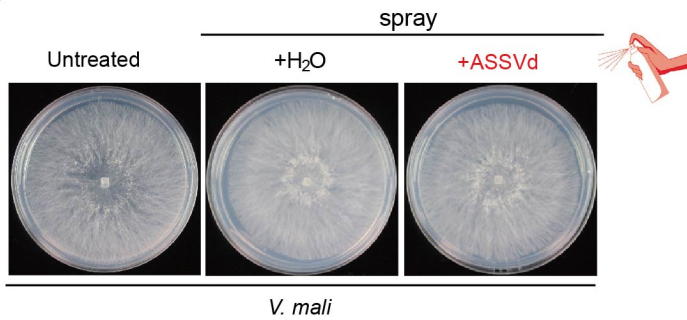

C

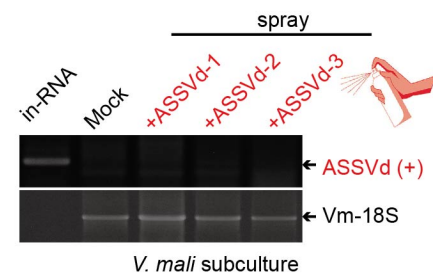

**Supp. Figure S9.** Exogenous inoculation of fungal mycelia with viroid RNAs. (A) Experimental procedure for direct application (spray) of *in-vitro* transcripts of viroid cDNA clones to fungal mycelia. (B) Phenotypic growth of *V. mali* treated with ASSVd RNAs (incompatible host). (C) RT-PCR analysis confirmed the absence of ASSVd RNA in treated fungi shown in B (three independent fungal subcultures).

**Table S1. A list of primers used in this study.**

| Primer Name | Oligonucleotide sequence (5'- 3')                                             | Usage                                                  |
|-------------|-------------------------------------------------------------------------------|--------------------------------------------------------|
| 107-T7-F    | gtattgggatggaacggtaccTCTAGATAATACGACTCACTATAGGGCGGGACTTACTTGTGGTTCCTG         | For CSVd infectious clone (Acc.no. V01107.1) (398 bp)  |
| 107-SP6-R   | ccattgggatggaacggtaccCTATAGTGTACCTAAATAAGCTTAGGGAACAATACTAAGGTTCCAAGG         |                                                        |
| 646-T7-F    | gtattgggatggaacggtaccTCTAGATAATACGACTCACTATAGGGGGTAAACACCGTGCGGTTCC           | For ASSVd infectious clone (Acc.no. M36646.1) (371 bp) |
| 646-SP6-R   | gtattgggatggaacggtaccTCTAGATAATACGACTCACTATAGGGGGTAAACACCGTGCGGTTCC           |                                                        |
| 09-T7-F     | gtattgggatggaacggtaccTCTAGATAATACGACTCACTATAGGGCTGGGGAATTCTCGAGTTGCC          | For HSVd infectious clone (Acc.no. X00009.1) (401 bp)  |
| 09-SP6-R    | ccattgggatggaacggtaccCTATAGTGTACCTAAATAAGCTTAGGGGCTCAAGAGAGGATCCG             |                                                        |
| 734-T7-F    | gtattgggatggaacggtaccTCTAGATAATACGACTCACTATAGGGCGTGGTTCCAATGGTGCACC           | For IrVd infectious clone (Acc.no. X95734.1) (412 bp)  |
| 734-SP6-R   | ccattgggatggaacggtaccCTATAGTGTACCTAAATAAGCTTAGGGTTTCCTTTAGAAGCCCAC            |                                                        |
| 465-T7-F    | gtattgggatggaacggtaccTCTAGATAATACGACTCACTATAGGGCGGAACTAAACTCGTGGTTCCT         | For PSTVd infectious clone (Acc.no. V01465.1) (339 bp) |
| 465-SP6-R   | ccattgggatggaacggtaccCTATAGTGTACCTAAATAAGCTTAGGAACCAACTGCGGTTCCA              |                                                        |
| 020-T7-F    | gtattgggatggaacggtaccTCTAGATAATACGACTCACTATAGGGTTTATTAGAACAAGAAGTGAGGATATGATT | For ASBVd infectious clone (Acc.no. J02020.1) (289 bp) |
| 020-SP6-R   | ccattgggatggaacggtaccCTATAGTGTACCTAAATAAGCTTCAAGATTTTGTAAAAACAATGAAGATA       |                                                        |
| 545-T7-F    | gtattgggatggaacggtaccTCTAGATAATACGACTCACTATAGGGGTCATAAGTTTCGTTCGATTTCAG       | For PLMVd infectious clone (Acc.no. X95734.1) (379 bp) |
| 545-SP6-R   | ccattgggatggaacggtaccCTATAGTGTACCTAAATACTAGTAAGAAGAGTTTCGTCTCATCTCAGAG        |                                                        |
| ASBVd-6F    | AGAACAAGAAGTGAGGATATGATTA AAC                                                 | For ASBVd RT-PCR (227 bp)                              |
| ASBVd-233R  | ACAATGAAGATAGAGGAGTAAACC                                                      |                                                        |
| HSVd-2F     | TGGGGAATTCTCGAGTTGCCGC                                                        | For HSVd RT-PCR (299 bp)                               |
| HSVd-301R   | AGGGGCTCAAGAGAGGATCCGC                                                        |                                                        |
| PSTVd-5F    | ACTAAACTCGTGGTTCCTGTGGTTC                                                     | For PSTVd RT-PCR (356 bp)                              |
| PSTVd-361R  | AACCAACTGCGGTTCCAAGGGC                                                        |                                                        |
| PLMVd-2F    | TCATAAGTTTCGTTCGATTTCAGC                                                      | For PLMVd RT-PCR (339 bp)                              |
| PLMVd-341R  | AAGAAGAGTTTCGTCTCATCTCAGAG                                                    |                                                        |
| IRVd-3F     | TGGTCCAATGGTGCACCCCTGACC                                                      | For IRVd RT-PCR (351 bp)                               |
| IRVd-354R   | ACCCTCGCCGCGCAGCAGAAGAATG                                                     |                                                        |
| CSVd-99F    | AACCTGGAGGAAGTCCGACGAGA                                                       | For CSVd RT-PCR (204 bp)                               |
| CSVd-303R   | GGTTGGA AAAAAAAGGCGTTGAAG                                                     |                                                        |
| ASSVd-29F   | GCCCCGCAACGCAGAAGATAAA                                                        | For ASSVd RT-PCR (246 bp)                              |
| ASSVd-275R  | AAAAGAGGGTGAGAGAACAGGGG                                                       |                                                        |
| IRVd-177F   | AACAGGAGCTCGACTCCTTCCTTTC                                                     | For IRVd inverse RT-PCR (370 bp)                       |
| IRVd-177R   | TCTTCCGCCGCGAGGAGTTCTCC                                                       |                                                        |
| HSVd-143F   | TAGAGGCTCTGCCTTCGAAACACCATC                                                   | For HSVd inverse RT-PCR (359 bp)                       |
| HSVd-142R   | CTCCAGAGCACCGCGCCCTCTCTC                                                      |                                                        |
| ASBVd-115F  | TGAGAGAAGGAGGAGTCGTGGTGAAC                                                    | For ASBVd inverse RT-PCR (203 bp)                      |
| ASBVd-71R   | TCGGAAAGTCGGAACAGACCTGGTTTC                                                   |                                                        |
| Fg18S-F     | AGGCAATAACAGGTCTGTGATGCC                                                      |                                                        |

Fg-18S-R TGAGCCATTCAATCGGTAGTAGCG  
Cp-18S-F ATAACAGGTCTGTGATGCCCTTAG  
Cp-18S-R CTCGCTGGCTCTGTCAGTGTAG  
Vm-actin-F GGTGGTACCACCATGTACCCTGG  
Vm-actin-R AGAAGCACTTGCGGTGGACAATG  
Nb-18S-F GCAAGACCGAAACTCAAAGG  
Nb-18S-R TGTTTCATATGTCAAGGGCTGG  
CpH4F ACAGAACAGCAGAGACCACCATCC  
CpH4R AGGCATGCGCAGTTCCTGTAAGAG  
CpRsm22F AGAACTTGCCCCAGCAGCCACTG  
CpRsm22R ACGAGCCGAAGCCGACGTCCTCTG  
CHV1-496F ATGGCTCAATTAAGAAAACCCAGTC  
CHV1-1245R TCGGCCGCCAATCCGGGCAAG

---

For *F.g.* 18s rRNA (Acc. no.AB250414) (201 bp)  
For *C.p.* 18s rRNA (Acc. no.142441.1 ) (187 bp)  
For *V.m.* actin RNA (Acc. no.KC248177.1) (211 bp)  
For *N.b.* 18s rRNA (Acc. no. TC23401) (216 bp)  
For *C.p.* histone H4 RNA (Acc. no. TC23401) 510bp  
For *C.p.* CPNAD(P) RNA (Acc. no. 81184) 700bp  
For CHV1 gRNA (Acc. no. ATZ76099.1) 749 bp
